# Supplementary material
Source: Elsevier journal article supplement (https://www.sciencedirect.com/science/article/pii/S0021755718302894)
Supplement: mmc1 [file S0021755718302894:mmc1.docx]

JPED_2018-274 Original_Supplementary Material

**Supplementary Figure 1 - Percentage of deaths and serious suspected adverse drug reaction reports by age with trend line (n = 3,330, Brazil: 2008-2013). Source: Notivisa/Anvisa.**

|  |
| --- |
