# Supplementary material
Source: Elsevier journal article supplement (https://www.sciencedirect.com/science/article/pii/S0021755718302894)
Supplement: mmc2 [file S0021755718302894:mmc2.docx]

**Supplementary Table 1 - State distribution of suspect ADR reports (Brazil, 2008-2013).**

| **State** | **%** |
| --- | --- |
| North | 11.5 |
| Northeast | 23.5 |
| South | 24.5 |
| Southeast | 39 |
| Midwest | 1.5 |

ADR, Adverse Drug Reaction.

**Supplementary Table 2 - Main suspect ADR types reported in children aged 0-12 years by WHO-Art Code (Brazil, 2008-2013).**

| **WHO-Art Code** | **Description** | **n** |
| --- | --- | --- |
| 24001 | Pruritus | 368 |
| 27001 | Rash | 334 |
| 28003 | Erythema | 182 |
| 228001 | Vomiting | 170 |
| 44001 | Urticaria | 168 |
| 225003 | Hyperemia | 164 |
| 725001 | Fever | 120 |
| 28006 | Exanthema | 105 |
| 712001 | Allergic reaction | 96 |
| 205001 | Diarrhea | 82 |
| 224001 | Tachycardia | 82 |
| 308001 | Nausea | 78 |
| 207001 | Blush | 63 |
| 207003 | Hyperemia (skin) | 63 |
| 238005 | Abnormal eye discharge | 61 |
| 514001 | Dyspnea | 60 |
| 398001 | Edema | 54 |

ADR, Adverse Drug Reaction.

Source: Notivisa/Anvisa.
